# Supplementary material
Source: ML conference proceedings conference paper supplement (https://openreview.net/forum?id=PJwAkg0z7h)
Supplement: supplementary_material [file attachment]

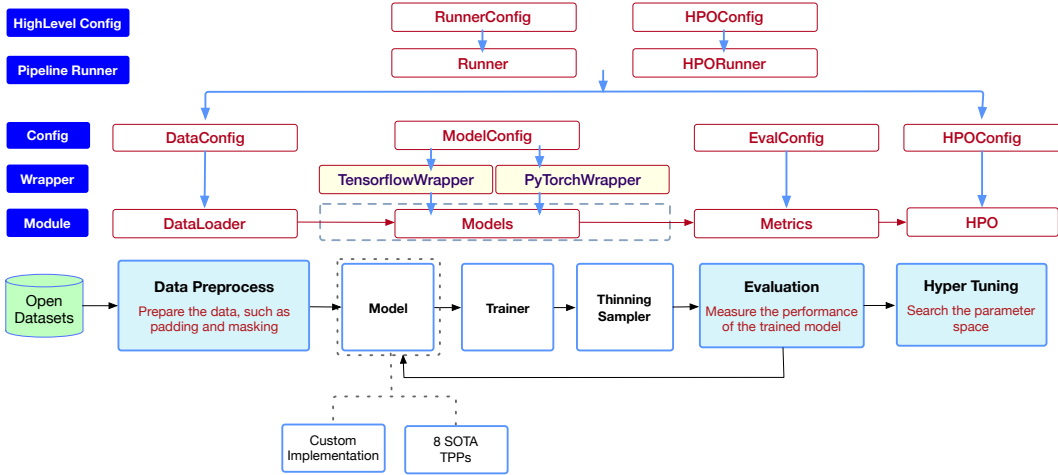

Figure 8: Architecture of the EasyTPP library. The dashed arrows show the different implementation possibilities, either to use pre-defined SOTA TPP models or provide a custom implementation. All dependencies between the configurations and modules are visualized by solid arrows with additional descriptions.

## Appendices

### A EASYTPP’S SOFTWARE INTERFACE DETAILS

In this section, we describe the architecture of our open-source benchmarking software EasyTPP in more detail and provide examples of different use cases and their implementation.

#### A.1 HIGH LEVEL SOFTWARE ARCHITECTURE

The purpose of building EasyTPP is to provide a simple and standardized framework to allow users to apply different state-of-the-art (SOTA) TPPs to arbitrary data sets. For researchers, EasyTPP provides an implementation interface to integrate new recourse methods in an easy-to-use way, which allows them to compare their method to already existing methods. For industrial practitioners, the availability of benchmarking code helps them easily assess the applicability of TPP models for their own problems.

A high level visualization of the EasyTPP’s software architecture is depicted in Figure 8. *Data Preprocess* component provides a common way to access the event data across the software and maintains information about the features. For the *Model* component, the library provides the possibility to use existing methods or extend the users’ custom methods and implementations. A *wrapper* encapsulates the black-box models along with the trainer and sampler. The primary purpose of the wrapper is to provide a common interface to easily fit in the training and evaluation pipeline, independently of their framework (e.g., PyTorch, TensorFlow). See Appendix A.2 and Appendix A.3 for details. The running of the pipeline is parameterized by the configuration class - *RunnerConfig* (without hyper-parameter tuning) and *HPOConfig* (with hyper-parameter tuning).

#### A.2 WHY DOES EASYTPP SUPPORT BOTH TENSORFLOW AND PYTORCH

TensorFlow and PyTorch are the two most popular Deep Learning (DL) frameworks today. PyTorch has a reputation for being a research-focused framework, and indeed, most of the authors have implemented TPPs in PyTorch, which are used as references by EasyTPP. On the other hand, TensorFlow has been widely used in real world applications. For example, Microsoft recommender,<sup>3</sup> NVIDIA

<sup>3</sup><https://github.com/microsoft/recommenders>.

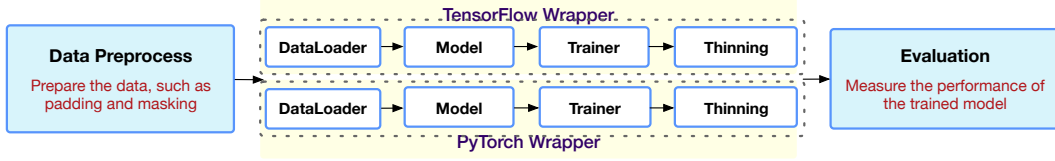

Figure 9: Illustration of TensorFlow and PyTorch Wrappers in the EasyTPP library.

Merlin<sup>4</sup> and Alibaba EasyRec<sup>5</sup> are well-known industrial user modeling systems with TensorFlow as the backend. In recent works, TPPs have been introduced to better capture the evolution of the user preference in continuous-time (Bao & Zhang, 2021; Fan et al., 2021; Bai et al., 2019). To support the use of TPPs by industrial practitioners, we implement an equivalent set of TPPs in TensorFlow. As a result, EasyTPP not only helps researchers analyze the strengths and bottlenecks of existing models, but also facilitates the deployment of TPPs in industrial applications.

### A.3 HOW DOES EASYTPP SUPPORT BOTH PYTORCH AND TENSORFLOW

We implement two equivalent sets of data loaders, models, trainers, thinning samplers in TensorFlow and PyTorch, respectively, then use wrappers to encapsulate them so that they have the same API exposed in the whole training and evaluation pipeline. See Figure 9.

### A.4 EASYTPP FOR RESEARCHERS

The research groups can inherit from the *BaseModel* to implement their own method in EasyTPP. This opens up a way of standardized and consistent comparisons between different TPPs when exploring new models.

Specifically, if we want to customize a TPP in PyTorch, we need to initialize the model by inheriting the class *TorchBaseModel*:

```

from easy_tpp.model.torch_model.torch_basemodel import TorchBaseModel

# Custom Torch TPP implementations need to
# inherit from the TorchBaseModel interface
class NewModel(TorchBaseModel):
    def __init__(self, model_config):
        super(NewModel, self).__init__(model_config)

    # Forward along the sequence, output the states / intensities at the event
    # times
    def forward(self, batch):
        ...
        return states

    # Compute the loglikelihood loss
    def loglike_loss(self, batch):
        ....
        return loglike

    # Compute the intensities at given sampling times
    # Used in the Thinning sampler
    def compute_intensities_at_sample_times(self, batch, sample_times, **kwargs):
        ...
        return intensities
  
```

<sup>4</sup><https://developer.nvidia.com/nvidia-merlin>.

<sup>5</sup><https://github.com/alibaba/EasyRec>.

Listing 3: Pseudo implementation of customizing a TPP model in PyTorch using EasyTPP.

Equivalent, if we want to customize a TPP in TensorFlow, we need to initialize the model by inheriting the class *TfBaseModel*:

```
from easy_tpp.model.torch_model.tf_basemodel import TfBaseModel

# Custom Torch TPP implementations need to
# inherit from the TorchBaseModel interface
class NewModel(TfBaseModel):
    def __init__(self, model_config):
        super(NewModel, self).__init__(model_config)

    # Forward along the sequence, output the states / intensities at the event
    # times
    def forward(self, batch):
        ...
        return states

    # Compute the loglikelihood loss
    def loglike_loss(self, batch):
        ....
        return loglike

    # Compute the intensities at given sampling times
    # Used in the Thinning sampler
    def compute_intensities_at_sample_times(self, batch, sample_times, **kwargs):
        ...
        return intensities
```

Listing 4: Pseudo implementation of customizing a TPP model in TensorFlow using EasyTPP.

## A.5 EASYTPP AS A MODELING LIBRARY

A common usage of the package is to train and evaluate some standard TPPs. This can be done by loading black-box-models and data sets from our provided datasets, or by user-defined models and datasets via integration with the defined interfaces. Listing 5 shows an implementation example of a simple use-case, fitting a TPP model method to a preprocessed dataset from our library.

```
import argparse

from easy_tpp.config_factory import Config
from easy_tpp.runner import Runner

def main():
    parser = argparse.ArgumentParser()

    parser.add_argument('--config_dir',
                        type=str,
                        required=False,
                        default='configs/experiment_config.yaml',
                        help='Dir of configuration yaml to train and evaluate the
model.')
```

```
    parser.add_argument('--experiment_id',
                        type=str,
                        required=False,
                        default='IntensityFree_train',
                        help='Experiment id in the config file.')
```

```

args = parser.parse_args()

# Build up the configuration for the runner
config = Config.build_from_yaml_file(args.config_dir, experiment_id=args.
experiment_id)

# Intialize the runner for the pipeline
model_runner = Runner.build_from_config(config)

# Start running
model_runner.run()

if __name__ == '__main__':
    main()

```

Listing 5: Example implementation of running a TPP model using EasyTPP.

## B MODEL IMPLEMENTATION DETAILS

We have implemented the following TPPs

- **Recurrent marked temporal point process (RMTTP)** (Du et al., 2016). We implemented both the Tensorflow and PyTorch version of RMTTP by our own.
- **Neural Hawkes process (NHP)** (Mei & Eisner, 2017) and **Attentive neural Hawkes process (AttNHP)** (Yang et al., 2022). The Pytorch implementation mostly comes from the code from the public GitHub repository at <https://github.com/yangalan123/anhp-andtt> (Yang et al., 2022) with MIT License. We developed the Tensorflow version of NHP and ttNHP by our own.
- **Self-attentive Hawkes process (SAHP)** (Zhang et al., 2020) and **transformer Hawkes process (THP)** (Zuo et al., 2020). We rewrote the PyTorch versions of SAHP and THP based on the public Github repository at <https://github.com/yangalan123/anhp-andtt> (Yang et al., 2022) with MIT License. We developed the Tensorflow versions of the two models by our own.
- **Intensity-free TPP (IFTTP)** (Shchur et al., 2020). The Pytorch implementation mostly comes from the code from the public GitHub repository at <https://github.com/shchur/ifl-ttp> (Shchur et al., 2020) with MIT License. We implemented a Tensorflow version by our own.
- **Fully network based TPP (FullyNN)** (Omi et al., 2019). We rewrote both the Tensorflow and PyTorch versions of the model faithfully based on the author’s code at <https://github.com/omitakahiro/NeuralNetworkPointProcess>. Please not that the model only considers the number of the types to be one, i.e., the sequence’s  $K = 1$ .
- **ODE-based TPP (ODETPP)** (Chen et al., 2021). We implement a TPP model, in both Tensorflow and PyTorch, with a continuous-time state evolution governed by a neural ODE. It is basically the spatial-temporal point process (Chen et al., 2021) without the spatial component.

### B.1 LIKELIHOOD COMPUTATION DETAILS

In this section, we discuss the implementation details of NLL computation in Equation (4).

The integral term in Equation (4) is computed using the Monte Carlo approximation given by Mei & Eisner (2017, Algorithm 1), which samples times  $t$ . This yields an unbiased stochastic gradient. For the number of Monte Carlo samples, we follow the practice of Mei & Eisner (2017): namely, at training time, we match the number of samples to the number of observed events at training time, a reasonable and fast choice, but to estimate log-likelihood when tuning hyperparameters or reporting final results, we take 10 times as many samples.

At each sampled time  $t$ , the Monte Carlo method still requires a summation over all events to obtain  $\lambda(t)$ . This summation can be expensive when there are many event types. This is not a serious problem for our EasyTPP implementation since it can leverage GPU parallelism.

## B.2 NEXT EVENT PREDICTION

It is possible to sample event sequences exactly from any intensity-based model in EasyTPP, using the **thinning algorithm** that is traditionally used for autoregressive point processes (Lewis & Shedler, 1979; Liniger, 2009). In general, to apply the thinning algorithm to sample the next event at time  $\geq t_0$ , it is necessary to have an upper bound on  $\{\lambda_e(t) : t \in [t_0, \infty)\}$  for each event type  $t$ . An explicit construction for the NHP (or AttNHP) model was given by Mei & Eisner (2017, Appendix B.3).

Section 3 includes a task-based evaluation where we try to predict the *time* and *type* of just the next event. More precisely, for each event in each held-out sequence, we attempt to predict its time given only the preceding events, as well as its type given both its true time and the preceding events.

We evaluate the time prediction with average  $L_2$  loss (yielding a root-mean-squared error, or **RMSE**) and evaluate the argument prediction with average 0-1 loss (yielding an **error rate**).

Following Mei & Eisner (2017), we use the minimum Bayes risk (MBR) principle to predict the time and type with the lowest expected loss. For completeness, we repeat the general recipe in this section.

For the  $i$ -th event, its time  $t_i$  has density  $p_i(t) = \lambda(t) \exp(-\int_{t_{i-1}}^t \lambda(t') dt')$ . We choose  $\int_{t_{i-1}}^\infty t p_i(t) dt$  as the time prediction because it has the lowest expected  $L_2$  loss. The integral can be estimated using i.i.d. samples of  $t_i$  drawn from  $p_i(t)$  by the thinning algorithm.

Given the next event time  $t_i$ , we choose the most probable type  $\arg \max_e \lambda_e(t_i)$  as the type prediction because it minimizes expected 0-1 loss.

## B.3 LONG HORIZON PREDICTION

The TPP models are typically autoregressive: predicting each future event is conditioned on all the previously predicted events. Following the approach in (Xue et al., 2022), we set up a prediction horizon and use OTD to measure the divergence between the ground truth sequence and the predicted sequence within the horizon. For more details about the setup and evaluation protocol, please see Section 5 in Xue et al. (2022).

## C DATASET DETAILS

To comprehensively evaluate the models, we preprocessed one synthetic and five real-world datasets from widely-cited works that contain diverse characteristics in terms of their application domains and temporal statistics. All preprocessed datasets are available at [Google Drive](#).

- **Synthetic.** This dataset contains synthetic event sequences from a univariate Hawkes process sampled using Tick (Bacry et al., 2017) whose conditional intensity function is defined by

$$\lambda(t) = \mu + \sum_{t_i < t} \alpha \beta \cdot \exp(-\beta(t - t_i))$$

with  $\mu = 0.2, \alpha = 0.8, \beta = 1.0$ . We randomly sampled disjoint train, dev, and test sets with 1200, 200 and 400 sequences.

- **Amazon** (Ni, 2018). This dataset includes time-stamped user product reviews behavior from January, 2008 to October, 2018. Each user has a sequence of produce review events with each event containing the timestamp and category of the reviewed product, with each category corresponding to an event type. We work on a subset of 5200 most active users with an average sequence length of 70 and then end up with  $K = 16$  event types.
- **Retweet** (Ke Zhou & Song., 2013). This dataset contains time-stamped user retweet event sequences. The events are categorized into  $K = 3$  types: retweets by “small,” “medium” and “large” users. Small users have fewer than 120 followers, medium users have fewer than 1363, and the rest are large users. We work on a subset of 5200 most active users with an average sequence length of 70.

| DATASET       | $K$ | # OF EVENT TOKENS |       |        | SEQUENCE LENGTH |      |     |
|---------------|-----|-------------------|-------|--------|-----------------|------|-----|
|               |     | TRAIN             | DEV   | TEST   | MIN             | MEAN | MAX |
| RETWEET       | 3   | 369000            | 62000 | 61000  | 10              | 41   | 97  |
| TAOBAO        | 17  | 350000            | 53000 | 101000 | 3               | 51   | 94  |
| AMAZON        | 16  | 288000            | 12000 | 30000  | 14              | 44   | 94  |
| TAXI          | 10  | 51000             | 7000  | 14000  | 36              | 37   | 38  |
| STACKOVERFLOW | 22  | 90000             | 25000 | 26000  | 41              | 65   | 101 |
| HAWKES-1D     | 1   | 55000             | 7000  | 15000  | 62              | 79   | 95  |

Table 1: Statistics of each dataset.

- **Taxi** (Whong, 2014). This dataset tracks the time-stamped taxi pick-up and drop-off events across the five boroughs of the New York City; each (borough, pick-up or drop-off) combination defines an event type, so there are  $K = 10$  event types in total. We work on a randomly sampled subset of 2000 drivers and each driver has a sequence. We randomly sampled disjoint train, dev and test sets with 1400, 200 and 400 sequences.
- **Taobao** (Xue et al., 2022). This dataset contains time-stamped user click behaviors on Taobao shopping pages from November 25 to December 03, 2017. Each user has a sequence of item click events with each event containing the timestamp and the category of the item. The categories of all items are first ranked by frequencies and the top 19 are kept while the rest are merged into one category, with each category corresponding to an event type. We work on a subset of 4800 most active users with an average sequence length of 150 and then end up with  $K = 20$  event types.
- **StackOverflow** (Leskovec & Krevl, 2014). This dataset has two years of user awards on a question-answering website: each user received a sequence of badges and there are  $K = 22$  different kinds of badges in total. We randomly sampled disjoint train, dev and test sets with 1400, 400 and 400 sequences from the dataset.

Table 1 shows statistics about each dataset mentioned above.

## D EXPERIMENT DETAILS

### D.1 SETUP

**Training Details.** For TPPs, the main hyperparameters to tune are the hidden dimension  $D$  of the neural network and the number of layers  $L$  of the attention structure (if applicable). In practice, the optimal  $D$  for a model was usually 16, 32, 64; the optimal  $L$  was usually 1, 2, 3, 4. To train the parameters for a given generator, we performed early stopping based on log-likelihood on the held-out dev set. The chosen parameters for the main experiments are given in Table 2.

**Computation Cost.** All the experiments were conducted on a server with 256G RAM, a 64 logical cores CPU (Intel(R) Xeon(R) Platinum 8163 CPU @ 2.50GHz) and one NVIDIA Tesla P100 GPU for acceleration. For training, the batch size is 256 by default. On all the dataset, the training of AttNHP takes most of the time (i.e., around 4 hours) while other models take less than 2 hours.

### D.2 SANITY CHECK

For each model we reproduced in our library, we ran experiments to ensure that our implementation could match the results in the original paper. We used the same hyperparameters as in original papers; we reran each experiment 5 times and took the average.

In Table 3, we show the relative differences between the implementations on Retweet and Taxi datasets. As we can see, all the relative differences are within  $(-5\%, 5\%)$ , indicating that our implementation is close to the original.

| MODEL         | DESCRIPTION          | VALUE USED |
|---------------|----------------------|------------|
| RMTPP         | <i>hidden_size</i>   | 32         |
|               | <i>time_emb_size</i> | 16         |
|               | <i>num_layers</i>    | 2          |
| NHP           | <i>hidden_size</i>   | 64         |
|               | <i>time_emb_size</i> | 16         |
|               | <i>num_layers</i>    | 2          |
| SAHP          | <i>hidden_size</i>   | 32         |
|               | <i>time_emb_size</i> | 16         |
|               | <i>num_layers</i>    | 2          |
| THP           | <i>num_heads</i>     | 2          |
|               | <i>hidden_size</i>   | 64         |
|               | <i>time_emb_size</i> | 16         |
| ATTNHP        | <i>num_layers</i>    | 2          |
|               | <i>num_heads</i>     | 2          |
|               | <i>hidden_size</i>   | 32         |
| ODETPP        | <i>time_emb_size</i> | 16         |
|               | <i>num_layers</i>    | 2          |
|               | <i>hidden_size</i>   | 32         |
| FULLYNN       | <i>time_emb_size</i> | 16         |
|               | <i>num_layers</i>    | 2          |
|               | <i>hidden_size</i>   | 32         |
| INTENSITYFREE | <i>time_emb_size</i> | 16         |
|               | <i>num_layers</i>    | 2          |

Table 2: Descriptions and values of hyperparameters used for models.

| MODEL   | METRICS (TIME RMSE / TYPE ERROR RATE) |                |
|---------|---------------------------------------|----------------|
|         | RETWEET                               | TAXI           |
| RMTPP   | −4.1% / − 3.5%                        | −2.9% / − 3.7% |
| NHP     | +3.4% / + 3.1%                        | +2.6% / + 3.5% |
| SAHP    | +1.3% / + 1.7%                        | +1.1% / + 1.2% |
| THP     | +1.3% / + 1.8%                        | −1.6% / + 1.5% |
| ATTNHP  | +1.2% / − 1.0%                        | −1.2% / − 1.2% |
| ODETPP  | −4.0% / − 3.9%                        | −4.3% / − 4.5% |
| FULLYNN | −5.0% / N.A.                          | −4.1% / N.A.   |
| IFTTP   | +3.4% / + 3.1%                        | +3.9% / + 3.0% |

Table 3: The relative difference between the results of EasyTPP and original implementations.

### D.3 MORE RESULTS.

For better visual comparisons, we present the results in Figure 5, Figure 6 and Figure 7 also in the form of tables, see Table 4 and Table 5.

The relative difference between the results of Torch and TensorFlow implementations can be found in Table 6.

## E ADDITIONAL NOTE

### E.1 CITATION COUNT IN ARXIV

We search the TPP-related articles in ArXiv <https://arxiv.org/> using their own search engine in three folds:

| MODEL   | METRICS (TIME RMSE / TYPE ERROR RATE) |                     |                     |                     |                     |
|---------|---------------------------------------|---------------------|---------------------|---------------------|---------------------|
|         | AMAZON                                | RETWEET             | TAXI                | TAOBAO              | STACKOVERFLOW       |
| MHP     | 0.635/75.9%                           | 22.92/55.7%         | 0.382/9.53%         | 0.539/68.1%         | 1.388/65.0%         |
| RMTTPP  | 0.620/68.1%                           | 22.31/44.1%         | 0.371/9.51%         | 0.531/55.8%         | 1.376/57.3%         |
| NHP     | 0.621/67.1%                           | <u>21.90</u> /40.0% | <u>0.369</u> /8.50% | 0.531/54.2%         | <u>1.372</u> /55.0% |
| SAHP    | 0.619/67.7%                           | 22.40/41.6%         | 0.372/9.75%         | 0.532/54.6%         | 1.375/56.1%         |
| THP     | 0.621/66.1%                           | 22.01/41.5%         | 0.370/8.68%         | 0.531/53.6%         | 1.374/55.0%         |
| ATTNHP  | 0.621/65.3%                           | 22.19/40.1%         | 0.371/8.71%         | <u>0.529</u> /53.7% | <u>1.372</u> /55.2% |
| ODETPP  | 0.620/65.8%                           | 22.48/43.2%         | 0.371/10.54%        | 0.533/55.4%         | 1.374/56.8%         |
| FULLYNN | <u>0.615</u> /N.A.                    | 21.92/N.A.          | 0.373/N.A.          | 0.529/N.A.          | 1.375/N.A.          |
| IFTTPP  | 0.618/67.5%                           | 22.18/ <u>39.7%</u> | 0.377/8.56%         | 0.531/55.4%         | 1.373/55.1%         |

Table 4: Performance in numbers of all methods mentioned in Figure 5.

| MODEL   | OTD                        |                          |                      |                       |
|---------|----------------------------|--------------------------|----------------------|-----------------------|
|         | RETWEET<br>AVG 5<br>EVENTS | RETWEET<br>AVG 10 EVENTS | TAXI<br>AVG 5 EVENTS | TAXI<br>AVG 10 EVENTS |
| MHP     | 5.128                      | 11.270                   | 4.633                | 12.784                |
| RMTTPP  | 5.107                      | 10.255                   | 4.401                | 12.045                |
| NHP     | 5.080                      | 10.470                   | 4.412                | 12.110                |
| SAHP    | 5.092                      | 10.475                   | 4.422                | 12.051                |
| THP     | 5.091                      | <u>10.450</u>            | <u>4.398</u>         | <u>11.875</u>         |
| ATTNHP  | <u>5.077</u>               | 10.447                   | 4.420                | 12.102                |
| ODETPP  | 5.115                      | 10.483                   | 4.408                | 12.095                |
| FULLYNN | N.A.                       | N.A.                     | N.A.                 | N.A.                  |
| IFTTPP  | 5.079                      | 10.513                   | 4.501                | 12.052                |

Table 5: Long horizon prediction on Retweet and Taxi data.

- Temporal point process: we search through the abstract of articles which contains the term ‘temporal point process’.
- Hawkes process: we search through the abstract of articles with the term ‘hawkes process’ but without the term ‘temporal point process’.
- Temporal event sequence: we search through the abstract of articles which include the term ‘temporal event sequence’ but exclude the term ‘hawkes process’ and ‘temporal point process’.

We group the articles found out by the search engine by years and report it in Figure 1.



| MODEL   | REL DIFF ON TIME RMSE (1ST ROW) AND TYPE ERROR RATE (2ND ROW) |         |       |        |               |
|---------|---------------------------------------------------------------|---------|-------|--------|---------------|
|         | AMAZON                                                        | RETWEET | TAXI  | TAOBAO | STACKOVERFLOW |
| RMTPP   | −0.2%                                                         | +1.0%   | +0.1% | +0.1%  | +0.4%         |
|         | +0.5%                                                         | +1.3%   | +0.6% | +0.2%  | −0.7%         |
| NHP     | +0.7%                                                         | +0.5%   | −0.2% | +0.1%  | −0.1%         |
|         | +0.6%                                                         | +1.4%   | +0.4% | −0.3%  | −0.1%         |
| SAHP    | −0.8%                                                         | +0.7%   | −0.8% | +0.4%  | 0.3%          |
|         | +0.6%                                                         | +0.6%   | −0.6% | +0.4%  | 0.3%          |
| THP     | +0.6%                                                         | +0.6%   | −0.2% | −0.5%  | 0.6%          |
|         | +1.2%                                                         | +0.9%   | −0.6% | +0.7%  | 0.4%          |
| ATTNHP  | +0.4%                                                         | +0.4%   | +0.3% | −0.1%  | −0.2%         |
|         | +0.2%                                                         | −0.7%   | −0.6% | +0.4%  | +0.2%         |
| ODETPP  | −0.5%                                                         | +1.1%   | +0.9% | +0.6%  | 0.4%          |
|         | +0.8%                                                         | +1.3%   | +1.1% | −0.5%  | −0.5%         |
| FULLYNN | +0.5%                                                         | −0.7%   | −0.3% | −0.3%  | +0.2%         |
|         | NA                                                            | NA      | NA    | NA     | NA            |
| IFTTPP  | −0.9%                                                         | +1.0%   | +0.4% | +0.6%  | +0.3%         |
|         | +0.4%                                                         | −0.7%   | −0.3% | +0.2%  | +0.2%         |

Table 6: Relative difference between Torch and TensorFlow implementations of methods in Figure 5.
